# Supplementary material for: A New Dietary Fiber Can Enhance Satiety and Reduce Postprandial Blood Glucose in Healthy Adults: A Randomized Cross-Over Trial
Source: MDPI journal article supplement (doi:10.3390/nu15214569), 2023-10-27
Supplement: s1 [file s1]

## **Supplementary information**

# **A new dietary fiber can enhance satiety and reduce postprandial blood glucose in healthy adults: a randomized cross-over trial**

Simou Wu<sup>1</sup>, Wen Jia<sup>1</sup>, Huimin He<sup>2</sup>, Jun Yin<sup>2</sup>, Huilin Xu<sup>2</sup>, Chengyuan He<sup>2</sup>, Qinqiu Zhang<sup>3</sup>,

Yue Peng<sup>3</sup>, Ruyue Cheng<sup>1</sup> \*

<sup>1</sup> Department of Nutrition and Food Hygiene, West China School of Public Health and West China Fourth Hospital, Sichuan University, 610041, Chengdu, China

<sup>2</sup>Recovery Plus USA, New York, NY 10019, USA

<sup>3</sup> Sichuan Key Laboratory of Fruit and Vegetable Postharvest Physiology, College of Food Science, Sichuan Agricultural University, 625014, Ya'an, China

\*Corresponding author: Ruyue Cheng

E-mail: ruyuecheng1993@163.com

Address: Department of Nutrition and Food Hygiene, West China School of Public Health and West China Fourth Hospital, Sichuan University, No.16, 3rd section, South Renmin Road, 610041 Chengdu, Sichuan, China

**Table S1 Information of meals in each group**

| Groups | Food Information              | Dietary fiber additions | Energy (kcal) | Carbohydrate energy ratio (%) | Protein energy ratio (%) | Fat energy ratio (%) | Dietary fiber Energy ratio (%) | Purified water with meals (mL) |
|--------|-------------------------------|-------------------------|---------------|-------------------------------|--------------------------|----------------------|--------------------------------|--------------------------------|
| B_C    | White bread 141 g             | 0                       | 341           | 58.6                          | 15                       | 22.8                 | 3.7                            | 250                            |
| B_Int0 | Pectin bread 154 g            | Pectin 3.8%             | 355           | 53.6                          | 16.5                     | 24.2                 | 5.6                            | 250                            |
| B_RPG  | RPG dietary fiber bread 152 g | RPG dietary fiber 3.8%  | 353           | 53.9                          | 16.5                     | 24.0                 | 5.6                            | 250                            |

Note: The bread for B\_Int0 was supplemented with pectin, the main ingredient in the RPG dietary fiber complex, in the same amount as the RPG experimental meal, both 3.8%.

**Table S2 Information of meals of RPG dietary fiber as meal preparations**

| Groups | Food information                                                        | Energy (kJ) | Carbohydrate (g)/energy ratio (%) | Protein (g)/energy ratio (%) | Fat (g)/energy ratio (%) | Dietary fiber (g)/energy ratio (%) |
|--------|-------------------------------------------------------------------------|-------------|-----------------------------------|------------------------------|--------------------------|------------------------------------|
| C      | Commercially available bean paste bun 105 g                             | 1193.9      | 53/75.5                           | 5.78/8.2                     | 5.3/16.3                 | 0                                  |
|        | Tangerine drink 150 mL                                                  | 66.3        | 1.8/46.2                          | 0                            | 0                        | 0                                  |
| Int0   | Commercially available bean paste bun 105 g                             | 1193.9      | 53/75.5                           | 5.78/8.2                     | 5.3/16.3                 | 0                                  |
|        | Tangerine drink 150 mL (pectin dietary fiber powder 6 g)                | 66.3        | 1.8/46.2                          | 0/0                          | 0/0                      | 4.2/53.8                           |
| Powder | Commercially available bean paste bun 105 g                             | 1193.9      | 53/75.5                           | 5.78/8.2                     | 5.3/16.3                 | 0                                  |
|        | Tangerine drink 150 mL (RPG dietary fiber powder 6 g)                   | 66.3        | 1.8/46.2                          | 0/0                          | 0/0                      | 4.2/53.8                           |
| Cap    | Commercially available bean paste bun 105 g                             | 1193.9      | 53/75.5                           | 5.78/8.2                     | 5.3/16.3                 | 0                                  |
|        | Tangerine drink 150 mL + RPG capsule 10 piece (RPG dietary fiber 5.6 g) | 50          | 1.21/41.5                         | 0/0                          | 0/0                      | 3.64/58.5                          |
